# Supplementary material for: Plasma lipids and glycaemic indices in Australians following plant-based diets versus a meat-eating diet
Source: PubMed Central journal article supplement (PMC11514886; doi:10.1186/s12944-024-02340-5), 2024-10-26
Supplement: 12944_2024_2340_MOESM1_ESM.pdf [file 12944_2024_2340_MOESM1_ESM.pdf]

**Supplementary Table 1.** Adjusted means, 95% CIs and percentage differences in lipid levels and glycaemic indices of plant-based diets compared to regular meat-eating diets.

|                          | <b>Vegan<br/>(n=48)</b> | <b>Lacto-ovo<br/>vegetarian (n=47)</b> | <b>Pesco-vegetarian<br/>(n=46)</b> | <b>Semi-vegetarian<br/>(n=44)</b> | <b>Regular meat<br/>eater (n=45)</b> |
|--------------------------|-------------------------|----------------------------------------|------------------------------------|-----------------------------------|--------------------------------------|
| <b>Lipid levels</b>      |                         |                                        |                                    |                                   |                                      |
| TC (mmol/L)              | 4.8 (4.56, 5.04)        | 5.37 (5.13, 5.60)                      | 5.45 (5.19, 5.70)                  | 5.20 (4.99, 5.41)                 | 5.57 (5.30, 5.85)                    |
| %                        | <b>14.85*</b>           | 3.66                                   | 2.18                               | 6.87                              | -                                    |
| TG (mmol/L)              | 1.01 (0.87, 1.15)       | 1.16 (1.01, 1.31)                      | 1.01 (0.81, 1.21)                  | 1.09 (0.96, 1.22)                 | 1.10 (0.96, 1.23)                    |
| %                        | 8.53                    | 5.31                                   | 8.53                               | 0.91                              | -                                    |
| LDL-C (mmol/L)           | 2.79 (2.58, 2.99)       | 3.27 (3.06, 3.48)                      | 3.37 (3.15, 3.59)                  | 3.09 (2.91, 3.28)                 | 3.50 (3.26, 3.74)                    |
| %                        | <b>22.57*</b>           | 6.79                                   | 3.78                               | <b>12.44</b>                      | -                                    |
| HDL-C (mmol/L)           | 1.54 (1.44, 1.64)       | 1.59 (1.50, 1.68)                      | 1.62 (1.50, 1.74)                  | 1.61 (1.51, 1.71)                 | 1.57 (1.47, 1.67)                    |
| %                        | 1.93                    | 1.27                                   | 3.13                               | 2.52                              | -                                    |
| Non-HDL-C (mmol/L)       | 3.25 (3.03, 3.47)       | 3.80 (3.57, 4.02)                      | 3.83 (3.57, 4.10)                  | 3.59 (3.39, 3.80)                 | 4.00 (3.75, 4.25)                    |
| %                        | <b>20.69*</b>           | 5.13                                   | 4.34                               | <b>10.80</b>                      | -                                    |
| TC/HDL-C ratio (mmol/L)  | 3.18 (2.94, 3.42)       | 3.53 (3.31, 3.76)                      | 3.55 (3.25, 3.84)                  | 3.54 (3.19, 3.89)                 | 3.67 (3.44, 3.89)                    |
| %                        | <b>14.31</b>            | 3.89                                   | 3.23                               | 3.61                              | -                                    |
| <b>Glycaemic indices</b> |                         |                                        |                                    |                                   |                                      |
| FBG (mmol/L)             | 4.56 (4.41, 4.70)       | 4.51 (4.38, 4.64)                      | 4.71 (4.56, 4.86)                  | 4.64 (4.48, 4.81)                 | 4.85 (4.68, 5.02)                    |
| %                        | <b>6.16</b>             | <b>7.26</b>                            | 2.93                               | 4.43                              | -                                    |
| HbA1c (IFFC, mmol/mol)   | 31.8 (31.1, 32.6)       | 33.3 (32.5, 34.1)                      | 33.0 (32.2, 33.8)                  | 33.1 (32.4, 33.8)                 | 33.7 (33.0, 34.4)                    |
| %                        | <b>5.80</b>             | 1.19                                   | 3.01                               | 1.80                              | -                                    |
| HbA1c (NGSP, %)          | 5.07 (5.00, 5.14)       | 5.20 (5.13, 5.27)                      | 5.17 (5.11, 5.24)                  | 5.19 (5.13, 5.25)                 | 5.24 (5.18, 5.31)                    |
| %                        | <b>3.30*</b>            | 0.77                                   | 11.34                              | 0.96                              | -                                    |
| Insulin (mU/L)           | 5.26 (4.36, 6.16)       | 6.55 (5.18, 7.91)                      | 6.00 (5.47, 6.52)                  | 7.11 (5.95, 8.27)                 | 7.02 (6.06, 7.98)                    |
| %                        | <b>28.66</b>            | 6.93                                   | 15.17                              | 1.27                              | -                                    |

Data is presented as adjusted means, 95% CIs and percentage differences. Multivariate regression analyses was used to adjust the model for age (years), sex (female, male), physical activity level (MET/week), total energy intake (kJ/day), duration of dietary pattern (years), alcohol intake (g), smoking status (yes, no), level of education (higher education yes, no), BMI (kg/m<sup>2</sup>) as a mediator and the addition of EPA/DHA supplement use (yes, no) for lipid levels. Bold values indicate statistical significance ( $P < 0.05$ ).  $P$ -values marked with an asterisk meet the Bonferroni corrected alpha ( $P = 0.001$ ). EPA, eicosapentaenoic acid; DHA, docosahexaenoic acid; FBG, fasting blood glucose; HbA1c, haemoglobin A1C; HDL-C, high-density lipoprotein cholesterol; LDL-C, low-density lipoprotein cholesterol; TC, total cholesterol; TG, triglycerides.
